# Supplementary material for: Spatial and temporal evolution of distal 10q deletion, a prognostically unfavorable event in diffuse low-grade gliomas
Source: PubMed Central journal article supplement (PMC4195855; doi:10.1186/s13059-014-0471-6), 2014-09-23

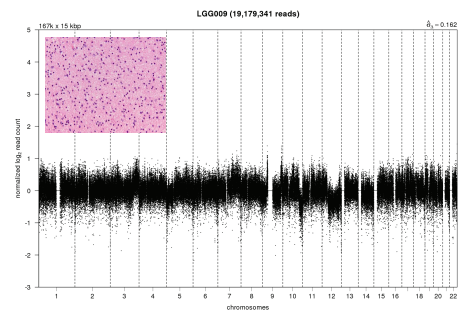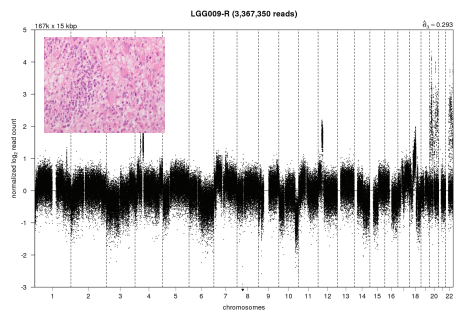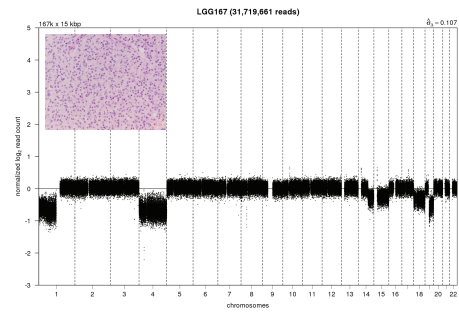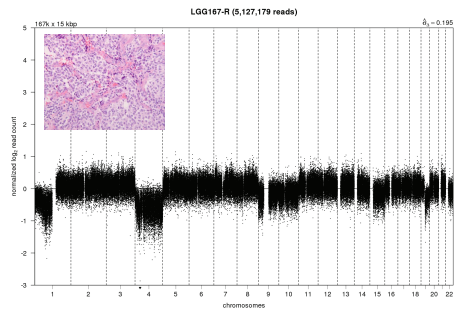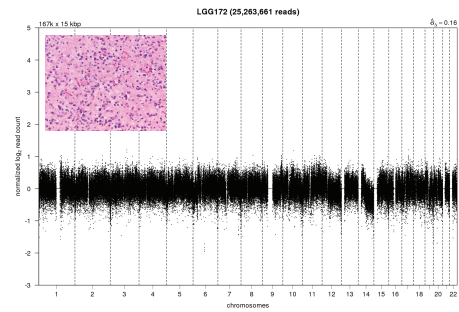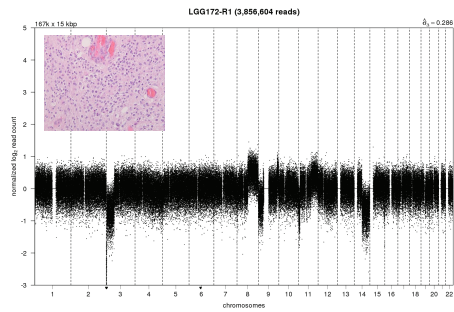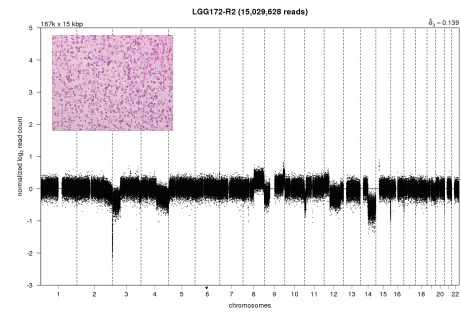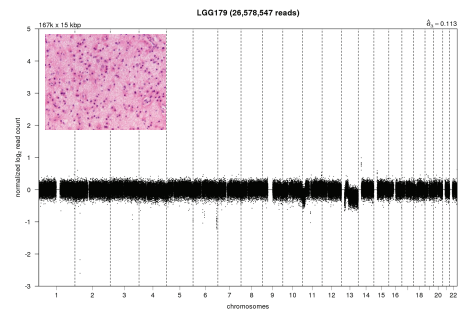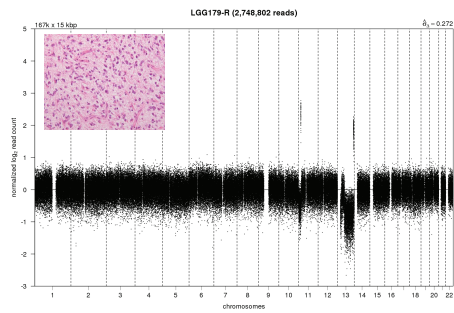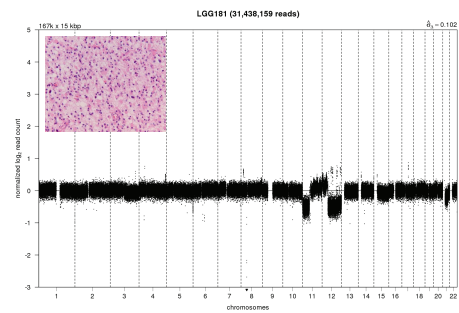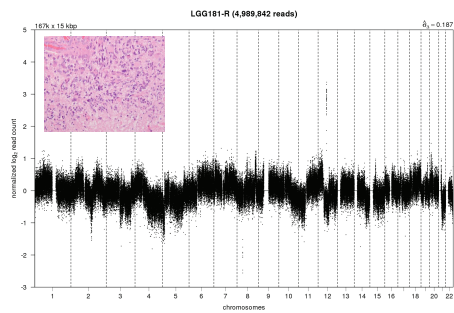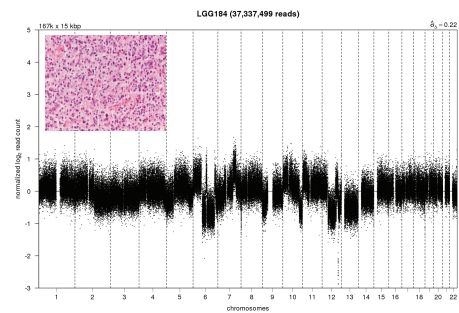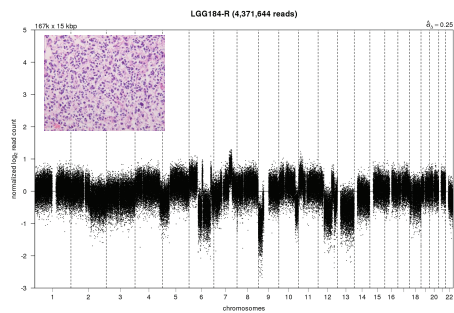

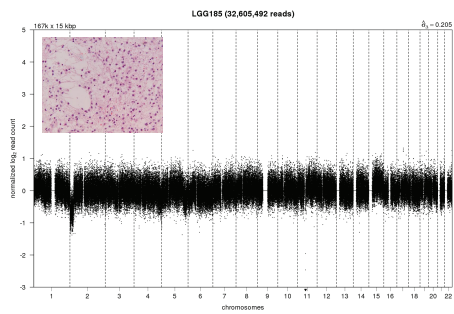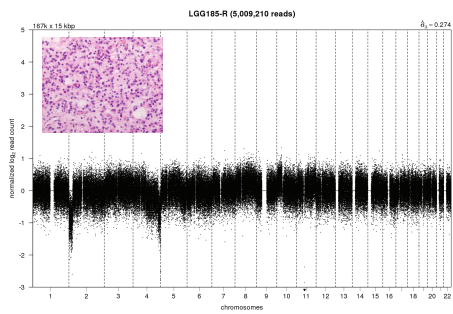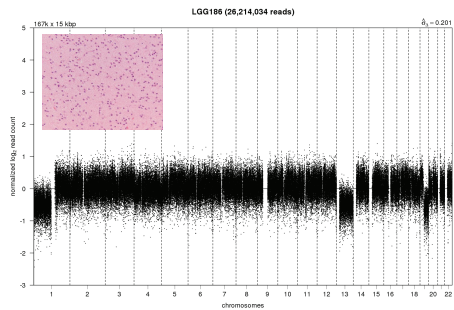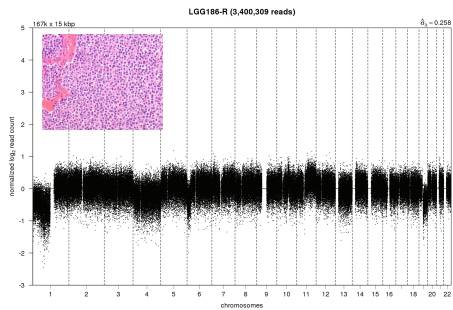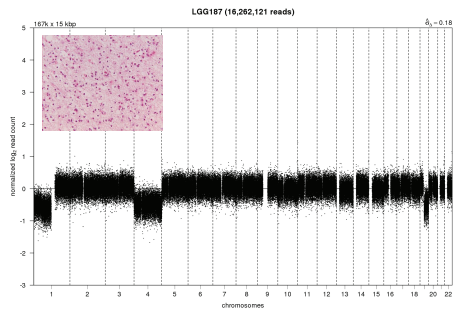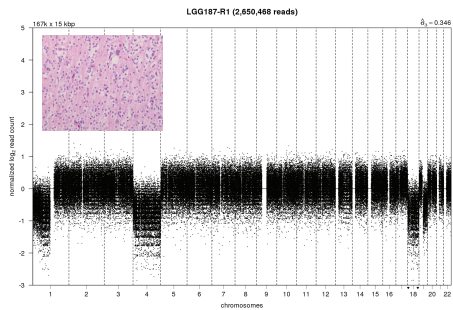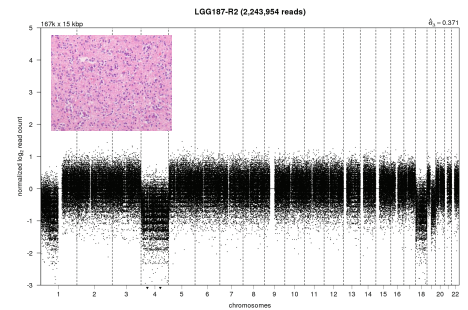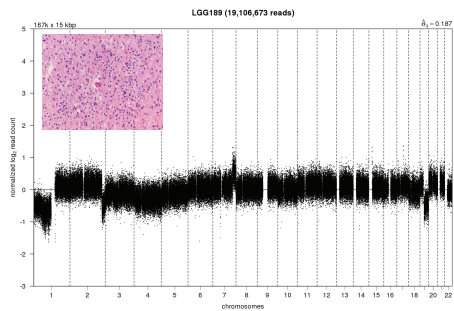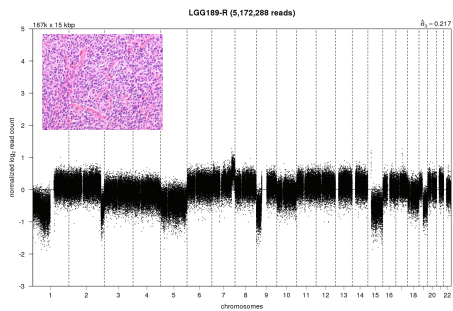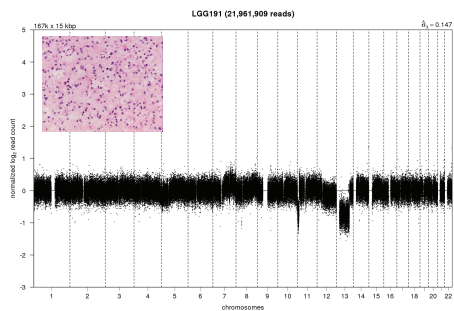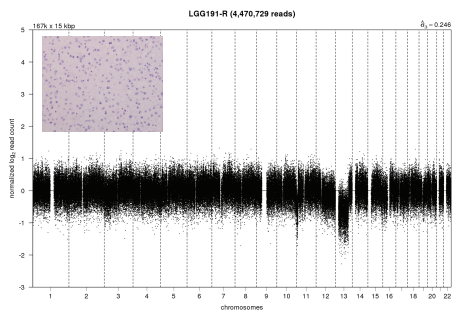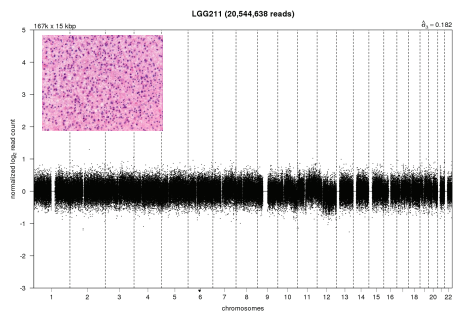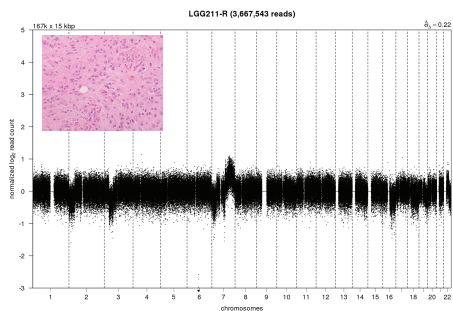

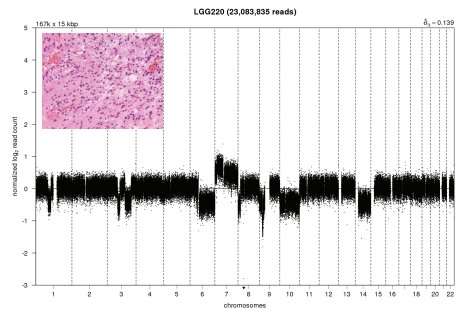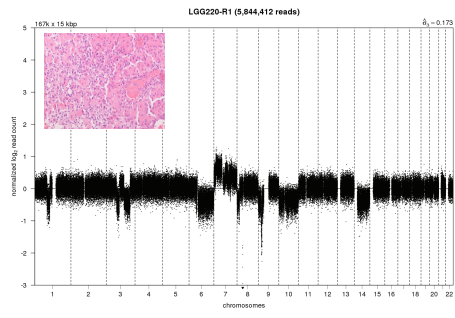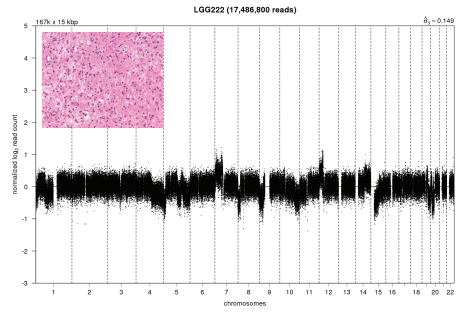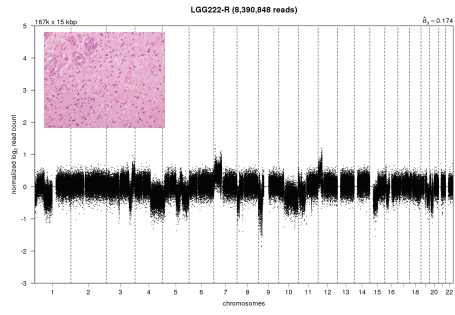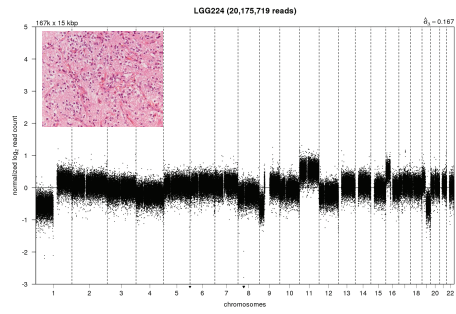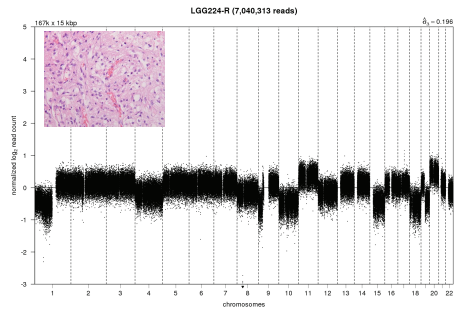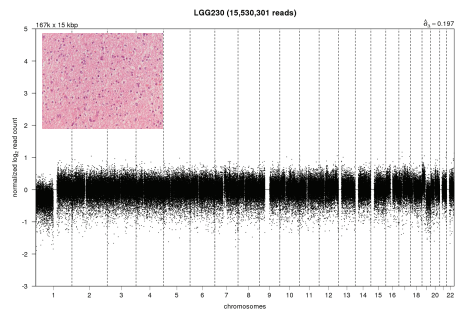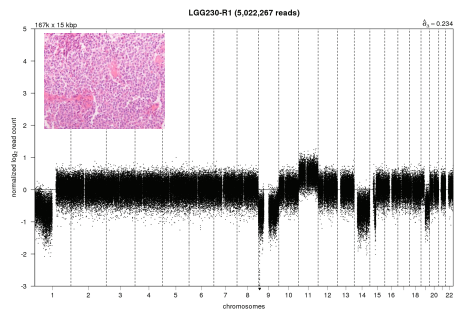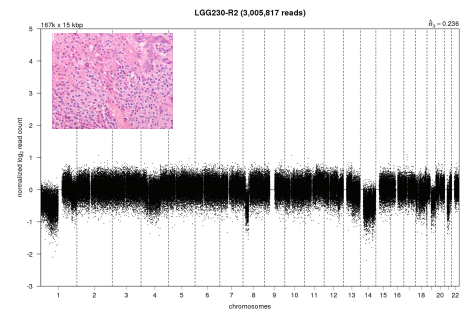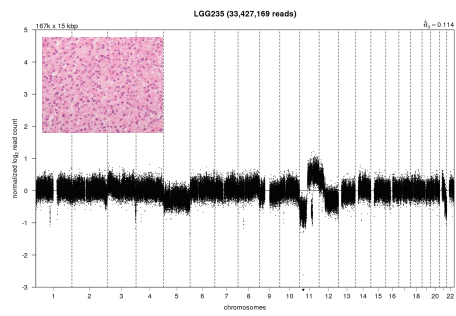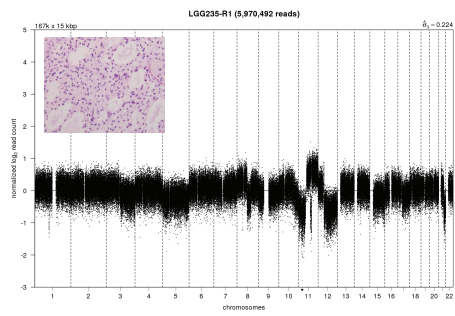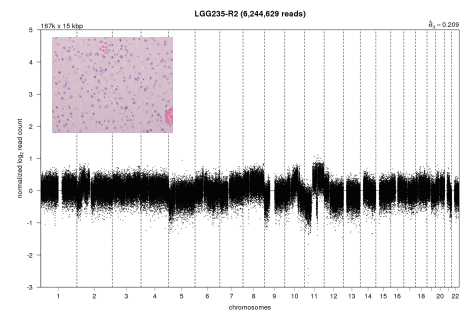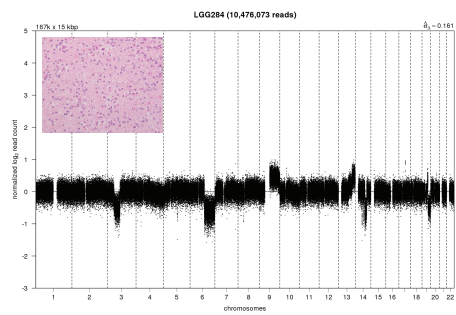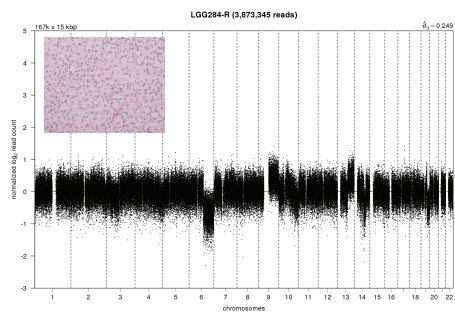



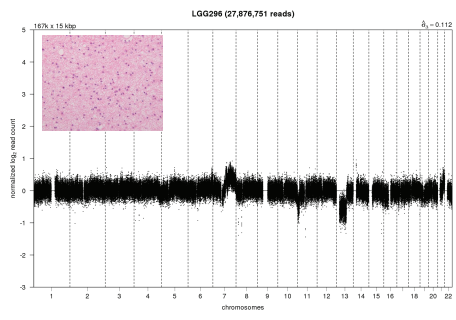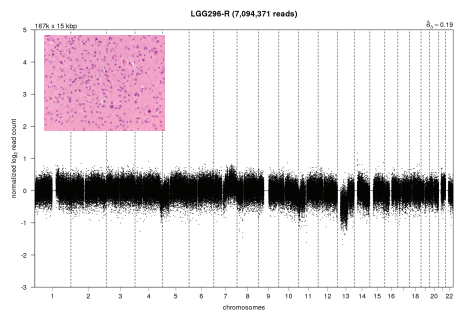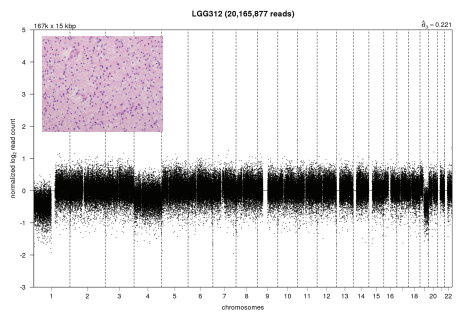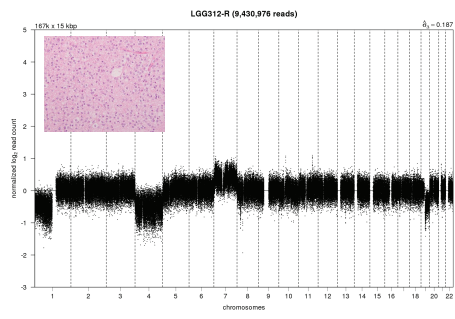

Supplement: 13059_2014_471_MOESM3_ESM.pdf [file 13059_2014_471_MOESM3_ESM.pdf]
